# Supplementary material
Source: Research Square preprint supplement (doi:10.21203/rs.3.rs-9036323/v1)
Supplement: Supplementary file 1 [file 2437ec09a0dfa583d9c19295.doc]

**Supplementary Materials**

**Supplementary Table 1. Model fit statistics for group-based trajectory models with 2-5 classes.**

**Supplementary Table 2.** Average Posterior Probabilities (APP) for Latent Creatinine Trajectory Classes.

**Supplementary Table 3. Univariable Cox regression analysis of covariates associated with 30-day mortality.**

**Supplementary Table 4. Missing data patterns for study variables.**

**Supplementary Table 5. Sensitivity analysis results using mean imputation for missing data.**

**Supplementary Table 6. Sensitivity analysis results including all patients diagnosed with SAD during their ICU stay.**

**Supplementary Table 1.** **Model fit statistics for group-based trajectory models with 2-5 classes.**

| **Groups** | **Log Likelihood** | **AIC** | **BIC (N=1447)** | **Entropy** | **Class 1 (%)** | **Class 2 (%)** | **Class 3 (%)** | **Class 4 (%)** | **Class 5 (%)** | **Class 6 (%)** |
| --- | --- | --- | --- | --- | --- | --- | --- | --- | --- | --- |
| **1** | **-25226.53** | **-25231.53** | **-25244.45** | **1.000** | **100.00** | **-** | **-** | **-** | **-** | **-** |
| **2** | **-23123.35** | **-23133.35** | **-23159.19** | **0.910** | **57.52** | **42.48** | **-** | **-** | **-** | **-** |
| **3** | **-22188.82** | **-22203.82** | **-22242.58** | **0.899** | **59.99** | **18.18** | **21.84** | **-** | **-** | **-** |
| **4** | **-21627.54** | **-21647.54** | **-21699.23** | **0.916** | **7.22** | **48.06** | **38.45** | **6.27** | **-** | **-** |
| **5** | **-21374.82** | **-21399.82** | **-21464.43** | **0.892** | **1.69** | **17.82** | **45.78** | **29.74** | **4.98** | **-** |
| **6** | **-21288.05** | **-21318.05** | **-21395.58** | **0.899** | **1.98** | **18.96** | **45.47** | **28.39** | **1.52** | **3.67** |

****Supplementary Table 2.** Average Posterior Probabilities (APP) for Latent Creatinine Trajectory Classes.**

| Class | APP |
| --- | --- |
| Class 1 | 0.927 |
| Class 2 | 0.906 |
| Class 3 | 0.908 |

Average posterior probabilities for each latent class derived from the three-trajectory latent growth mixture model. All values exceed the recommended threshold of 0.7, indicating excellent classification certainty and model adequacy.

**Supplementary Table 3.** Univariate Cox regression models were used to screen for confounders associated with 30-day mortality in patients with TBI.

| Variables | HR (95% CI) | Pvalue |
| --- | --- | --- |
| Age (years) | 1.026 (1.017–1.035) | <0.001 |
| Gender, n(%) |  |  |
| Female | Ref |  |
| Male | 0.915 (0.712–1.176) | 0.488 |
| Race (%) |  |  |
| Black | Ref |  |
| White | 0.801 (0.539–1.191) | 0.273 |
| Others | 0.613 (0.359–1.045) | 0.072 |
| BMI | 0.977 (0.960–0.994) | 0.009 |
| SOFA | 1.092 (1.055–1.130) | <0.001 |
| APSIII | 1.020 (1.015–1.025) | <0.001 |
| SAPS II | 1.032 (1.024–1.040) | <0.001 |
| OASIS | 1.044 (1.028–1.060) | <0.001 |
| CCI | 1.184 (1.138–1.231) | <0.001 |
| Hypertension (%) |  |  |
| No | Ref |  |
| Yes | 0.901 (0.698–1.162) | 0.421 |
| AKI(%) |  |  |
| No | Ref |  |
| Yes | 2.356 (1.806–3.074) | <0.001 |
| Pneumonia (%) |  |  |
| No | Ref |  |
| Yes | 1.660 (1.292–2.133) | <0.001 |
| Stroke (%) |  |  |
| No | Ref |  |
| Yes | 1.099 (0.732–1.649) | 0.65 |
| CKD(%) |  |  |
| No | Ref |  |
| Yes | 1.536 (1.163–2.027) | 0.002 |
| Cancer(%) |  |  |
| No | Ref |  |
| Yes | 1.583 (1.155–2.168) | 0.004 |
| T2DM (%) |  |  |
| No | Ref |  |
| Yes | 1.112 (0.852–1.453) | 0.434 |
| Heart failure (%) |  |  |
| No | Ref |  |
| Yes | 1.347 (1.043–1.738) | 0.022 |
| Ischemic cardiomyopathy (%) |  |  |
| No | Ref |  |
| Yes | 1.324 (1.029–1.704) | 0.029 |
| COPD (%) |  |  |
| No | Ref |  |
| Yes | 1.042 (0.757–1.435) | 0.8 |
| Hemoglobin (g/dL) | 0.926 (0.879–0.976) | 0.004 |
| Platelets (×103/µL) | 0.999 (0.998–1.000) | 0.183 |
| WBC (×103/µL) | 0.986 (0.969–1.003) | 0.096 |
| Anion gap | 1.047 (1.019–1.075) | 0.001 |
| Chloride(mEq/L) | 0.978 (0.962–0.995) | 0.013 |
| FBG (mg/dL) | 1.000 (0.999–1.002) | 0.76 |
| Potassium (mEq/L) | 1.057 (0.911–1.227) | 0.464 |
| Baseline sodium (mEq/L) | 1.003 (0.981–1.024) | 0.82 |
| SBP(mmHg) | 1.004 (0.999–1.008) | 0.127 |
| Heart rate(beats/min) | 1.005 (1.000–1.011) | 0.057 |
| DBP(mmHg) | 1.000 (0.999–1.000) | 0.82 |
| Respirationrate(beats/min) | 1.032 (1.014–1.051) | <0.001 |
| Temperature(f) | 0.985 (0.959–1.011) | 0.258 |
| SpO2(%) | 0.989 (0.960–1.019) | 0.454 |
| Invasive ventilation (%) |  |  |
| No | Ref |  |
| Yes | 0.777 (0.425–1.422) | 0.413 |
| Vasoactive drugs(%) |  |  |
| No | Ref |  |
| Yes | 1.473 (1.069–2.028) | 0.018 |

Data are presented as median (IQR) or frequencies (percentages). Abbreviation: BMI, body mass index; SOFA, sequential organ failure assessment; APS III, acute physiology score III; SAPS II, simplified acute physiological score II; OASIS, oxford acute severity of illness score; CCI: Charlson Comorbidity Index; AKI, acute kidney injury; CKD, chronic kidney disease; T2DM, type 2 diabetes mellitus; COPD, chronic obstructive pulmonary disease; WBC, white blood cells; FBG, fasting blood glucose; SBP, systolic blood pressure; DBP, diastolic blood pressure; SpO2, oxyhemoglobin saturation.

**Supplementary Table 4.** Proportion of missing variables

| Variables | Missing(%) |
| --- | --- |
| SOFA | 3.9 |
| APSIII | 3.9 |
| SAPS II | 3.9 |
| OASIS | 3.9 |
| CCI | 3.9 |
| Hemoglobin (g/dL) | 3.4 |
| Platelets (×103/µL) | 3.5 |
| WBC (×103/µL) | 3.3 |
| Anion gap | 3.5 |
| Chloride(mEq/L) | 3.5 |
| FBG (mg/dL) | 3.5 |
| Potassium (mEq/L) | 3.6 |
| Baseline sodium (mEq/L) | 3.5 |
| SBP(mmHg) | 4.3 |
| Heart rate(beats/min) | 3.7 |
| DBP(mmHg) | 4.3 |
| Respirationrate(beats/min) | 3.7 |
| Temperature(f) | 4.0 |
| SpO2(%) | 3.7 |
| Hypertension (%) | 3.6 |
| AKI(%) | 3.6 |
| Pneumonia (%) | 3.6 |
| Stroke (%) | 3.6 |
| CKD(%) | 3.6 |
| Cancer(%) | 3.6 |
| T2DM (%) | 3.6 |
| Heart failure (%) | 3.6 |
| Ischemic cardiomyopathy (%) | 3.6 |
| COPD (%) | 3.6 |
| Invasive ventilation (%) | 3.6 |
| Vasoactive drugs(%) | 3.5 |

SOFA, sequential organ failure assessment; APS III, acute physiology score III; SAPS II, simplified acute physiological score II; OASIS, oxford acute severity of illness score; CCI: Charlson Comorbidity Index; WBC, white blood cells; FBG, fasting blood glucose; SBP, systolic blood pressure; DBP, diastolic blood pressure; SpO2, oxyhemoglobin saturation; AKI, acute kidney injury; CKD, chronic kidney disease; T2DM, type 2 diabetes mellitus; COPD, chronic obstructive pulmonary disease.

****Supplementary Table 5. Sensitivity analysis results using mean imputation for missing data.****

| **Outcome** | **Model 1** | | **Model 2** | | **Model 3** | |
| --- | --- | --- | --- | --- | --- | --- |
| **HR (95% CI)** | **P** | **HR (95% CI)** | **P** | **HR (95% CI)** | **P** |
| 30-day mortality | | | | | | |
| Basic serum sodium level tertiles | | | | | | |
| T 1 | ref |  | ref |  | ref |  |
| T 2 | 0.739 (0.626 - 0.872) | <0.001 | 0.731 (0.619 - 0.863) | <0.001 | 0.961 (0.799 - 1.155) | 0.668 |
| T 3 | 0.842 (0.709 - 0.999) | 0.049 | 0.786 (0.661 - 0.935) | 0.006 | 1.170 (0.941 - 1.455) | 0.157 |
| Serum sodium Trajectories | | | | | | |
| Class 1 | ref |  | ref |  | ref |  |
| Class 2 | 1.540 (1.302 - 1.820) | <0.001 | 1.465 (1.238 - 1.734) | <0.001 | 1.135 (0.948 - 1.359) | 0.167 |
| Class 3 | 1.748 (1.469 - 2.080) | <0.001 | 1.688 (1.417 - 2.010) | <0.001 | 1.708 (1.423 - 2.050) | <0.001 |
| 365-day mortality | | | | | | |
| Basic serum sodium level tertiles | | | | | | |
| T 1 | ref |  | ref |  | ref |  |
| T 2 | 0.770 (0.660 - 0.899) | 0.001 | 0.763 (0.653 - 0.891) | 0.001 | 1.005 (0.845 - 1.194) | 0.958 |
| T 3 | 0.853 (0.726 - 1.002) | 0.053 | 0.799 (0.678 - 0.940) | 0.007 | 1.204 (0.980 - 1.480) | 0.077 |
| Serum sodium Trajectories | | | | | | |
| Class 1 | ref |  | ref |  | ref |  |
| Class 2 | 1.540 (1.302 - 1.820) | <0.001 | 1.485 (1.268 - 1.740) | <0.001 | 1.153 (0.973 - 1.366) | 0.100 |
| Class 3 | 1.748 (1.469 - 2.080) | <0.001 | 1.734 (1.472 - 2.043) | <0.001 | 1.761 (1.483 - 2.090) | <0.001 |

**Supplementary Table 6. Sensitivity analysis results including all patients diagnosed with SAD during their ICU stay.**

| **Outcome** | **Model 1** | | **Model 2** | | **Model 3** | |
| --- | --- | --- | --- | --- | --- | --- |
| **HR (95% CI)** | **P** | **HR (95% CI)** | **P** | **HR (95% CI)** | **P** |
| 30-day mortality | | | | | | |
| Basic serum sodium level tertiles | | | | | | |
| T 1 | ref |  | ref |  | ref |  |
| T 2 | 0.743 (0.630 - 0.876) | <0.001 | 0.738 (0.625 - 0.870) | <0.001 | 0.976 (0.813 - 1.171) | 0.793 |
| T 3 | 0.837 (0.706 - 0.993) | 0.042 | 0.784 (0.660 - 0.932) | 0.006 | 1.154 (0.930 - 1.432) | 0.193 |
| Serum sodium Trajectories | | | | | | |
| Class 1 | ref |  | ref |  | ref |  |
| Class 2 | 1.540 (1.302 - 1.820) | <0.001 | 1.449 (1.225 - 1.714) | <0.001 | 1.139 (0.954 - 1.361) | 0.151 |
| Class 3 | 1.748 (1.469 - 2.080) | <0.001 | 1.665 (1.398 - 1.982) | <0.001 | 1.676 (1.398 - 2.009) | <0.001 |
| 365-day mortality | | | | | | |
| Basic serum sodium level tertiles | | | | | | |
| T 1 | ref |  | ref |  | ref |  |
| T 2 | 0.772 (0.662 - 0.900) | 0.001 | 0.770 (0.660 - 0.899) | 0.001 | 1.021 (0.861 - 1.211) | 0.812 |
| T 3 | 0.849 (0.723 - 0.997) | 0.046 | 0.802 (0.682 - 0.943) | 0.008 | 1.185 (0.967 - 1.452) | 0.101 |
| Serum sodium Trajectories | | | | | | |
| Class 1 | ref |  | ref |  | ref |  |
| Class 2 | 1.562 (1.336 - 1.828) | <0.001 | 1.475 (1.260 - 1.726) | <0.001 | 1.157 (0.979 - 1.366) | 0.087 |
| Class 3 | 1.789 (1.521 - 2.105) | <0.001 | 1.712 (1.454 - 2.015) | <0.001 | 1.709 (1.442 - 2.025) | <0.001 |
