# Supplementary material
Source: Research Square preprint supplement (doi:10.21203/rs.3.rs-9036323/v1)
Supplement: Supplementary file 2 [file 7b34cc75631e6a4368fd0b98.doc]

**Table 1. Clinical Characteristics and Outcomes by Serum Sodium Trajectory in SAD Patients**

| **Variables** | **Total(n=1,447)** | **Class 1(n=868)** | **Class 2(n=263)** | **Class 3(n=316)** | **P** |
| --- | --- | --- | --- | --- | --- |
| Age (years) | 67.0 (56.0-79.0) | 66.0 (55.0-78.0) | 68.0 (58.0-78.5) | 69.5 (57.0-81.0) | 0.038 |
| Gender, n(%) |  |  |  |  |  |
| Female | 589 (40.70) | 344 (39.63) | 107 (40.68) | 138 (43.67) | 0.457 |
| Male | 858 (59.30) | 524 (60.37) | 156 (59.32) | 178 (56.33) |  |
| Race (%) |  |  |  |  |  |
| Black | 133 (9.19) | 70 (8.06) | 22 (8.37) | 41 (12.97) | 0.129 |
| White | 1,123 (77.61) | 680 (78.34) | 208 (79.09) | 235 (74.37) |  |
| Others | 191 (13.20) | 118 (13.59) | 33 (12.55) | 40 (12.66) |  |
| BMI | 27.658 (24.049-32.665) | 27.993 (24.42-33.207) | 26.352 (23.016-31.887) | 27.337 (23.903-31.029) | 0.015 |
| SOFA | 7 (4-9) | 7 (4-9) | 7 (4-10) | 7 (4-10) | 0.952 |
| APSIII | 48 (37-63) | 47 (36-61) | 50 (37.5-65) | 48 (37-64) | 0.138 |
| SAPS II | 41 (32-50) | 40 (31-50) | 40 (32-50) | 42 (33-51) | 0.441 |
| OASIS | 36 (31-42) | 36 (31-41.25) | 36 (29-41) | 36 (31-42) | 0.100 |
| CCI | 5 (3-7) | 5 (3-7) | 6 (3-8) | 6 (3-8) | <0.001 |
| Hypertension (%) |  |  |  |  |  |
| No | 856 (59.16) | 508 (58.53) | 150 (57.03) | 198 (62.66) | 0.327 |
| Yes | 591 (40.84) | 360 (41.47) | 113 (42.97) | 118 (37.34) |  |
| AKI(%) |  |  |  |  |  |
| No | 736 (50.86) | 464 (53.46) | 138 (52.47) | 134 (42.41) | 0.003 |
| Yes | 711 (49.14) | 404 (46.54) | 125 (47.53) | 182 (57.59) |  |
| Pneumonia (%) |  |  |  |  |  |
| No | 795 (54.94) | 505 (58.18) | 152 (57.79) | 138 (43.67) | <0.001 |
| Yes | 652 (45.06) | 363 (41.82) | 111 (42.21) | 178 (56.33) |  |
| Stroke (%) |  |  |  |  |  |
| No | 1,309 (90.46) | 779 (89.75) | 246 (93.54) | 284 (89.87) | 0.172 |
| Yes | 138 (9.54) | 89 (10.25) | 17 (6.46) | 32 (10.13) |  |
| CKD(%) |  |  |  |  |  |
| No | 1,147 (79.27) | 701 (80.76) | 208 (79.09) | 238 (75.32) | 0.123 |
| Yes | 300 (20.73) | 167 (19.24) | 55 (20.91) | 78 (24.68) |  |
| Cancer(%) |  |  |  |  |  |
| No | 1,254 (86.66) | 766 (88.25) | 221 (84.03) | 267 (84.49) | 0.093 |
| Yes | 193 (13.34) | 102 (11.75) | 42 (15.97) | 49 (15.51) |  |
| T2DM (%) |  |  |  |  |  |
| No | 1,017 (70.28) | 618 (71.20) | 172 (65.40) | 227 (71.84) | 0.156 |
| Yes | 430 (29.72) | 250 (28.80) | 91 (34.60) | 89 (28.16) |  |
| Heart failure (%) |  |  |  |  |  |
| No | 978 (67.59) | 595 (68.55) | 169 (64.26) | 214 (67.72) | 0.428 |
| Yes | 469 (32.41) | 273 (31.45) | 94 (35.74) | 102 (32.28) |  |
| Ischemic cardiomyopathy (%) |  |  |  |  |  |
| No | 934 (64.55) | 574 (66.13) | 156 (59.32) | 204 (64.56) | 0.129 |
| Yes | 513 (35.45) | 294 (33.87) | 107 (40.68) | 112 (35.44) |  |
| COPD (%) |  |  |  |  |  |
| No | 1,187 (82.03) | 713 (82.14) | 213 (80.99) | 261 (82.59) | 0.874 |
| Yes | 260 (17.97) | 155 (17.86) | 50 (19.01) | 55 (17.41) |  |
| Hemoglobin (g/dL) | 10.4 (8.7-12.3) | 10.5 (8.7-12.4) | 10 (8.4-11.65) | 10.6 (9-12.6) | 0.001 |
| Platelets (×103/µL) | 181 (127-249) | 186 (130-251) | 181 (121.5-262) | 174 (123-235) | 0.190 |
| WBC (×103/µL) | 12.6 (8.6-17.2) | 12.8 (8.4-17.725) | 12.3 (8.8-16.65) | 12.1 (8.875-16.6) | 0.544 |
| Anion gap | 14 (12-17) | 14 (12-17) | 14 (12-18) | 15 (13-17) | 0.102 |
| Chloride(mEq/L) | 104 (100-108) | 105 (101-108) | 100 (94-104) | 107 (103-111) | <0.001 |
| FBG (mg/dL) | 134 (110-175) | 136 (111-177) | 130 (104-172.5) | 137 (110-175) | 0.856 |
| Potassium (mEq/L) | 4.1 (3.7-4.6) | 4.1 (3.8-4.6) | 4.2 (3.7-4.7) | 4 (3.6-4.5) | 0.002 |
| Baseline sodium (mEq/L) | 139 (136-142) | 139 (136-141) | 134 (131-137) | 143 (140-146) | <0.001 |
| SBP(mmHg) | 119 (103-138) | 119 (102-138) | 119 (100.5-138.5) | 121 (106.75-141) | 0.137 |
| Heart rate(beats/min) | 89 (77.5-105) | 89 (78-105) | 89 (77-104) | 89.5 (77.75-105) | 0.461 |
| DBP(mmHg) | 68 (57-81) | 67 (57-79) | 66 (54-81.5) | 71.5 (60-85) | 0.158 |
| Respiration rate(breaths/min) | 19 (16-23) | 19 (16-24) | 18 (15-23) | 20 (16-24) | 0.167 |
| Temperature(f) | 98.4 (97.8-99) | 98.4 (97.8-99.1) | 98.3 (97.7-98.8) | 98.5 (98-99.2) | 0.317 |
| SpO2(%) | 99 (96-100) | 99 (96-100) | 99 (96-100) | 99 (96-100) | 0.885 |
| Invasive ventilation (%) |  |  |  |  |  |
| No | 51 (3.52) | 27 (3.11) | 9 (3.42) | 15 (4.75) | 0.400 |
| Yes | 1396 (96.48) | 841 (96.89) | 254 (96.58) | 301 (95.25) |  |
| Vasoactive drugs(%) |  |  |  |  |  |
| No | 351 (24.26) | 201 (23.16) | 54 (20.53) | 96 (30.38) | 0.011 |
| Yes | 1,096 (75.74) | 667 (76.84) | 209 (79.47) | 220 (69.62) |  |
| 30-day mortality(%) | 249 (17.21) | 123 (14.17) | 45 (17.11) | 81 (25.63) | <0.001 |
| 365-day mortality(%) | 278 (19.21) | 140 (16.13) | 50 (19.01) | 88 (27.85) | <0.001 |

Data are presented as median (interquartile range, IQR) or n (%). Abbreviations: BMI, body mass index; SOFA, Sequential Organ Failure Assessment; APS III, Acute Physiology Score III; SAPS II, Simplified Acute Physiology Score II; OASIS, Oxford Acute Severity of Illness Score; CCI, Charlson Comorbidity Index; AKI, acute kidney injury; CKD, chronic kidney disease; T2DM, type 2 diabetes mellitus; COPD, chronic obstructive pulmonary disease; WBC, white blood cell count; FBG, fasting blood glucose; SBP, systolic blood pressure; DBP, diastolic blood pressure; SpO2, peripheral oxygen saturation.

****Table 2. Association of Serum Sodium Levels with 30-Day and 365-Day Mortality Among SAD Patients****

| **Outcome** | **Model 1** | | **Model 2** | | **Model 3** | |
| --- | --- | --- | --- | --- | --- | --- |
| **HR (95% CI)** | **P** | **HR (95% CI)** | **P** | **HR (95% CI)** | **P** |
| 30-day mortality | | | | | | |
| Basic serum sodium level tertiles | | | | | | |
| T 1 | ref |  | ref |  | ref |  |
| T 2 | 0.747 (0.557–1.003) | 0.052 | 0.760 (0.566–1.020) | 0.068 | 0.998 (0.721–1.383) | 0.992 |
| T 3 | 0.809 (0.596–1.099) | 0.176 | 0.758 (0.557–1.034) | 0.08 | 0.998 (0.679–1.465) | 0.99 |
| Serum sodium Trajectories | | | | | | |
| Class 1 | ref |  | ref |  | ref |  |
| Class 2 | 1.208(0.858-1.699) | 0.279 | 1.162 (0.825–1.637) | 0.389 | 0.831 (0.577–1.197) | 0.319 |
| Class 3 | 1.941(1.466-2.57) | <0.001 | 1.735 (1.307–2.305) | <0.001 | 1.744 (1.296–2.347) | <0.001 |
| 365-day mortality | | | | | | |
| Basic serum sodium level tertiles | | | | | | |
| T 1 | ref |  | ref |  | ref |  |
| T 2 | 0.827 (0.628–1.090) | 0.177 | 0.842 (0.639–1.110) | 0.223 | 1.123 (0.827–1.526) | 0.458 |
| T 3 | 0.817 (0.609–1.096) | 0.178 | 0.771 (0.573–1.038) | 0.086 | 1.035 (0.715–1.496) | 0.857 |
| Serum sodium Trajectories | | | | | | |
| Class 1 | ref |  | ref |  | ref |  |
| Class 2 | 1.183 (0.856–1.634) | 0.308 | 1.146 (0.829–1.585) | 0.409 | 0.823 (0.583–1.162) | 0.269 |
| Class 3 | 1.867 (1.430–2.438) | <0.001 | 1.684 (1.286–2.205) | <0.001 | 1.694 (1.277–2.247) | <0.001 |

**T1: sodium<138.0, T2: 138.0≤sodium<142.0, T3: sodium≥142.0. Model 1: Unadjusted crude model. Model 2: Adjusted for sex, age, race, BMI, and respiratory rate. Model 3: Model 2 plus disease severity scores (SOFA, APS III, SAPS II, OASIS, CCI), comorbidities (AKI, pneumonia, CKD, malignancy, heart failure, ischemic heart disease), vasoactive medications, and laboratory parameters (hemoglobin, anion gap, chloride).**
